# Supplementary material for: Mutactimycin AP, a New Mutactimycin Isolated from an Actinobacteria from the Atacama Desert
Source: Molecules. 2022 Oct 24;27(21):7185. doi: 10.3390/molecules27217185 (PMC9656151; doi:10.3390/molecules27217185)
Supplement: Supplementary file 1 [file molecules-27-07185-s001.zip › molecules-1964943-supplementary.pdf]

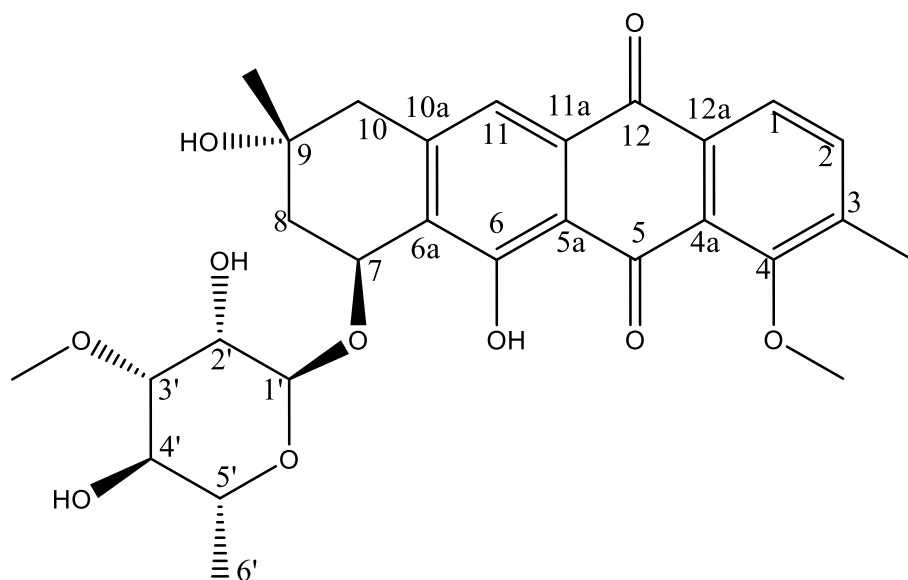

Structure of compound 1

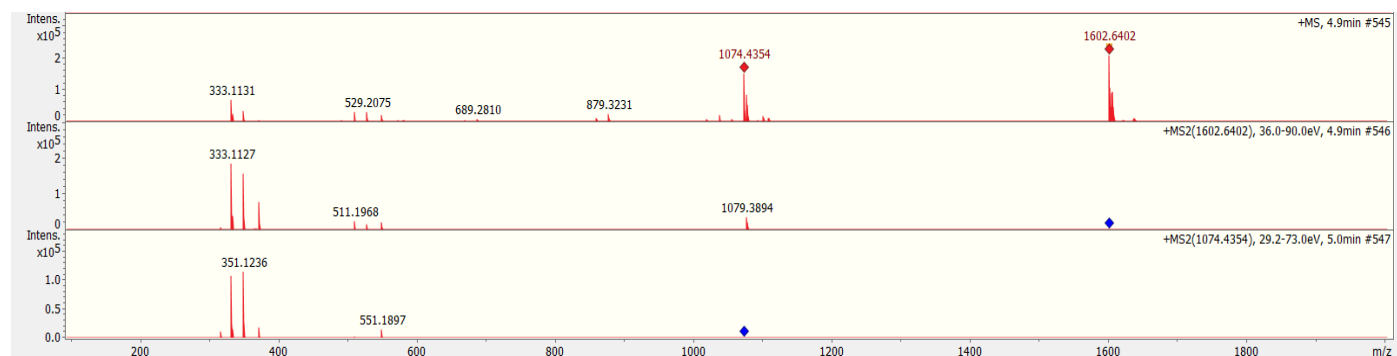

**Figure S1:** Mass spectrum of compound 1

$[M+H]^+$  appears at  $m/z$  529.2075 with formula  $C_{28}H_{33}O_{10}$  (error: -1.2 ppm msigma: 7.2)

The  $[aglycone + H]^+$  appears at  $m/z$  351.1236

The  $m/z$  appearing at 551.1897 corresponds to  $[M+Na]^+$

The  $m/z$  appearing at 1074.4354 corresponds to  $[2M+NH_4]^+$

The  $m/z$  appearing at 1079.3894 corresponds to  $[2M+Na]^+$

The  $m/z$  appearing at 1602.6402 corresponds to  $[3M+Na]^+$

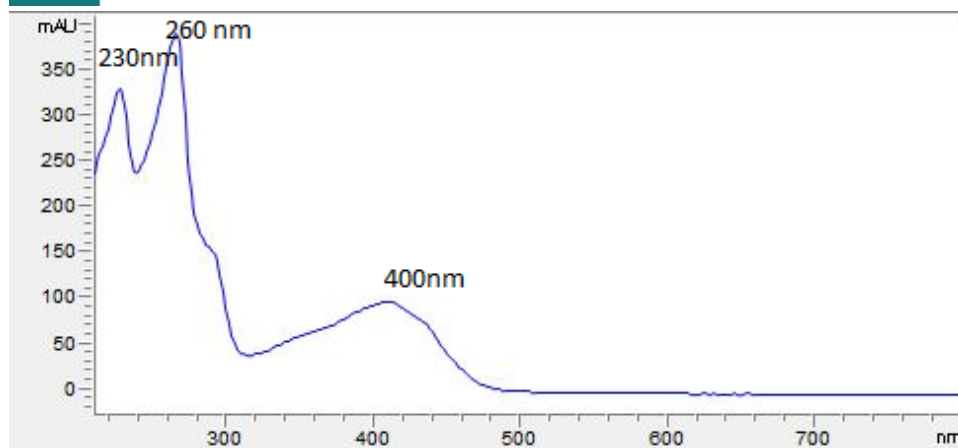

**Figure S2:** Annotated UV spectrum of compound **1**

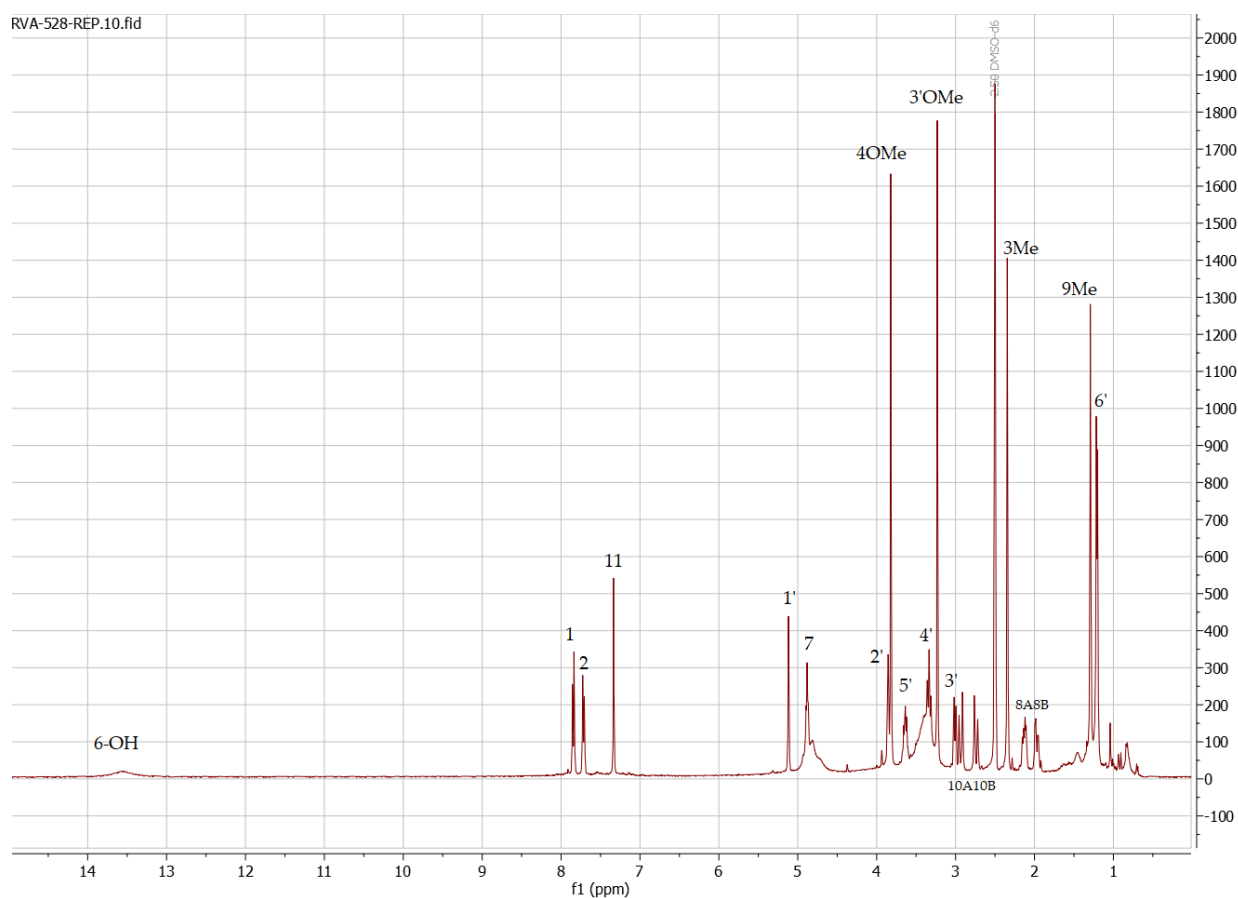

**Figure S3:** Annotated <sup>1</sup>H NMR spectrum of compound **1** in DMSO-d<sub>6</sub> at 400MHz

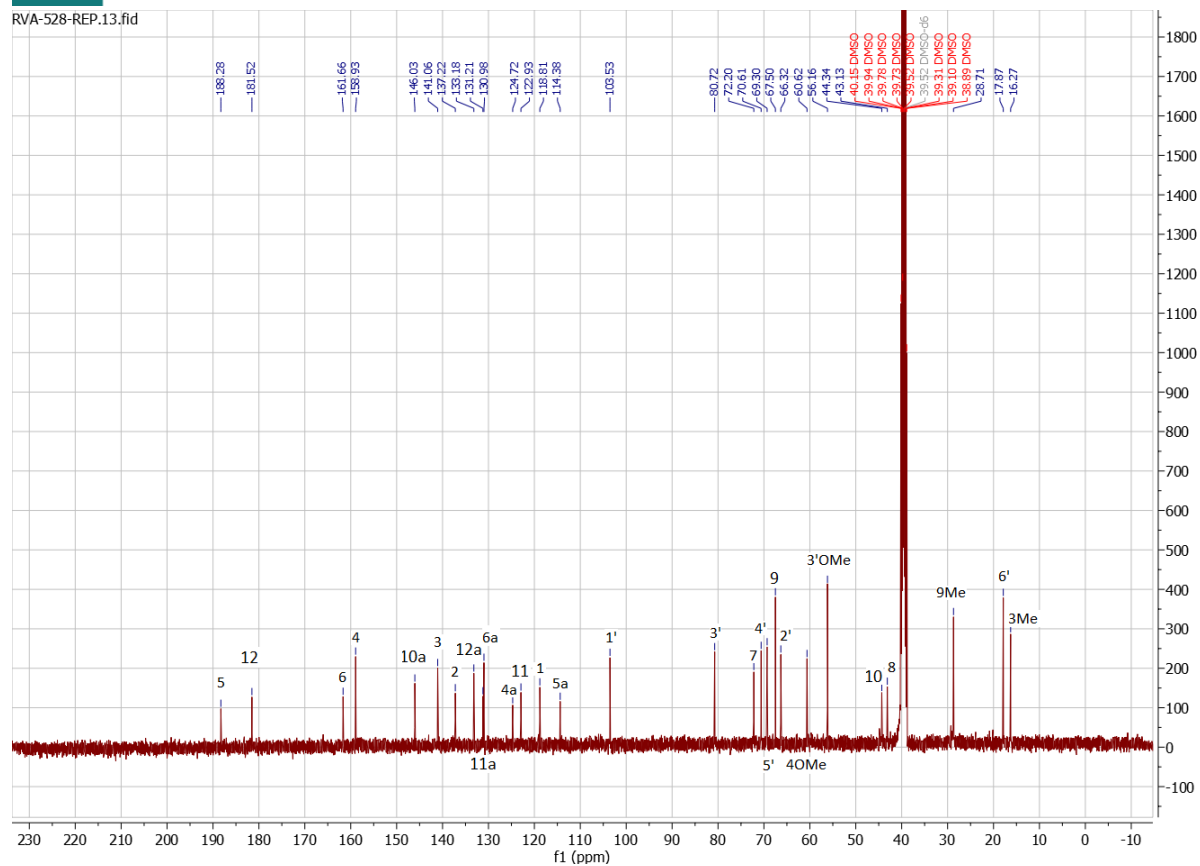

**Figure S4:** Annotated  $^{13}\text{C}$  NMR spectrum of compound **1** in  $\text{DMSO-d}_6$  at 400MHz

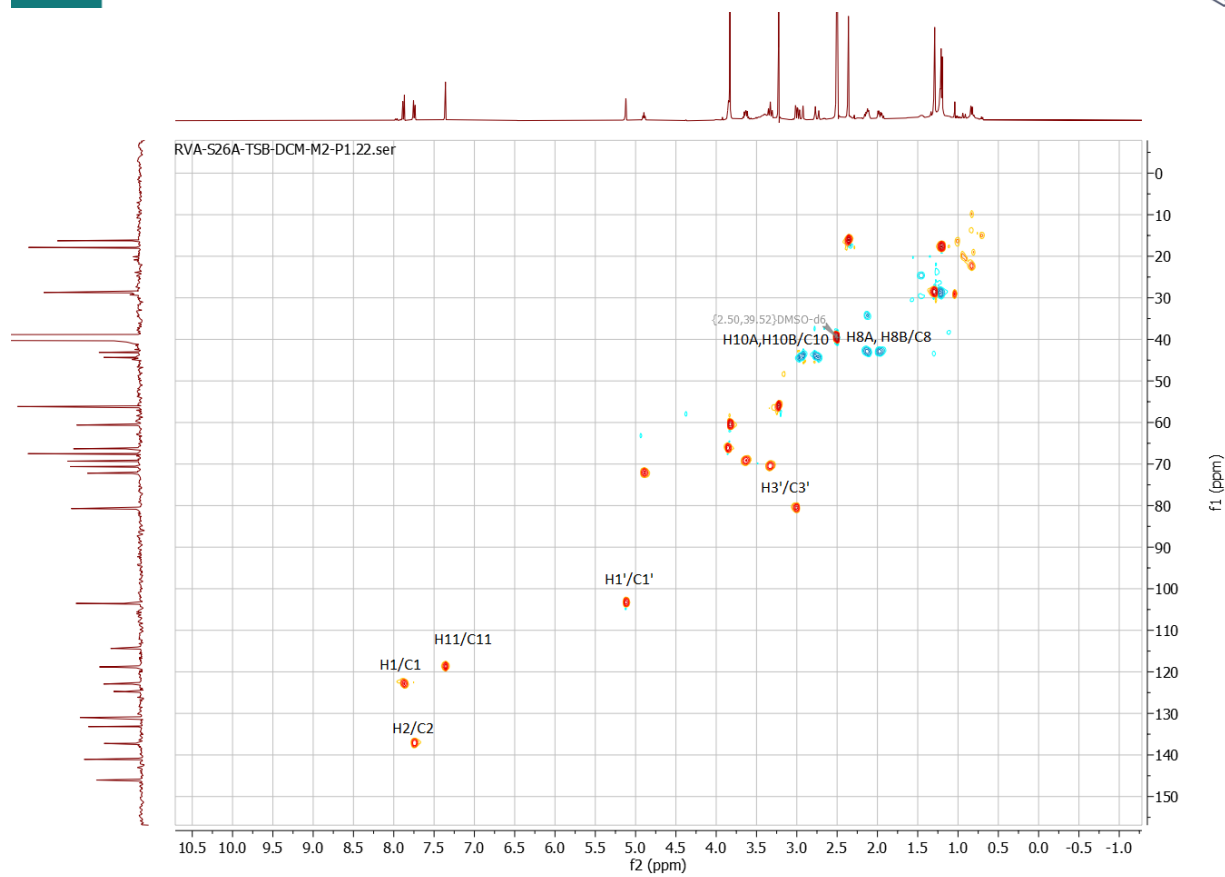

**Figure S5:** HSQC spectrum of compound **1** in DMSO-d<sub>6</sub> at 400 MHz with Key correlations annotated

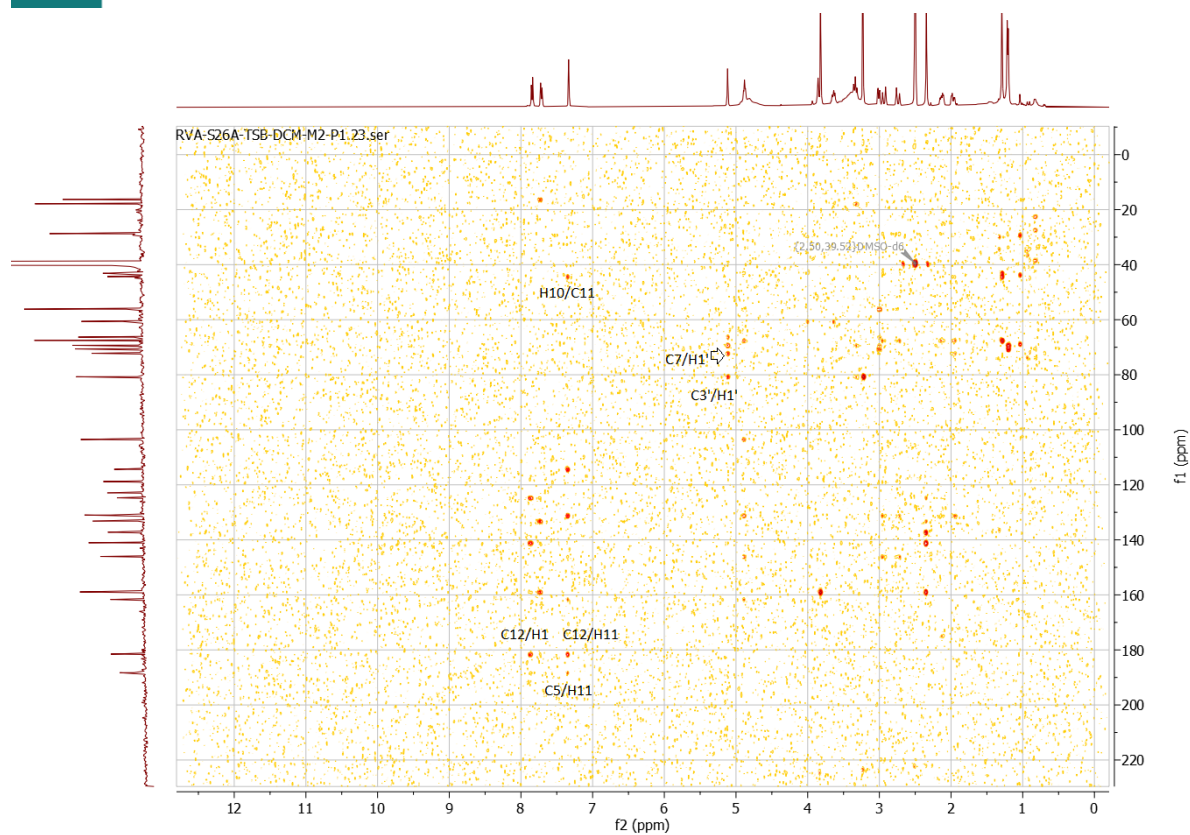

**Figure S6:** HMBC spectrum of compound **1** in DMSO at 400 MHz with key correlations annotated.

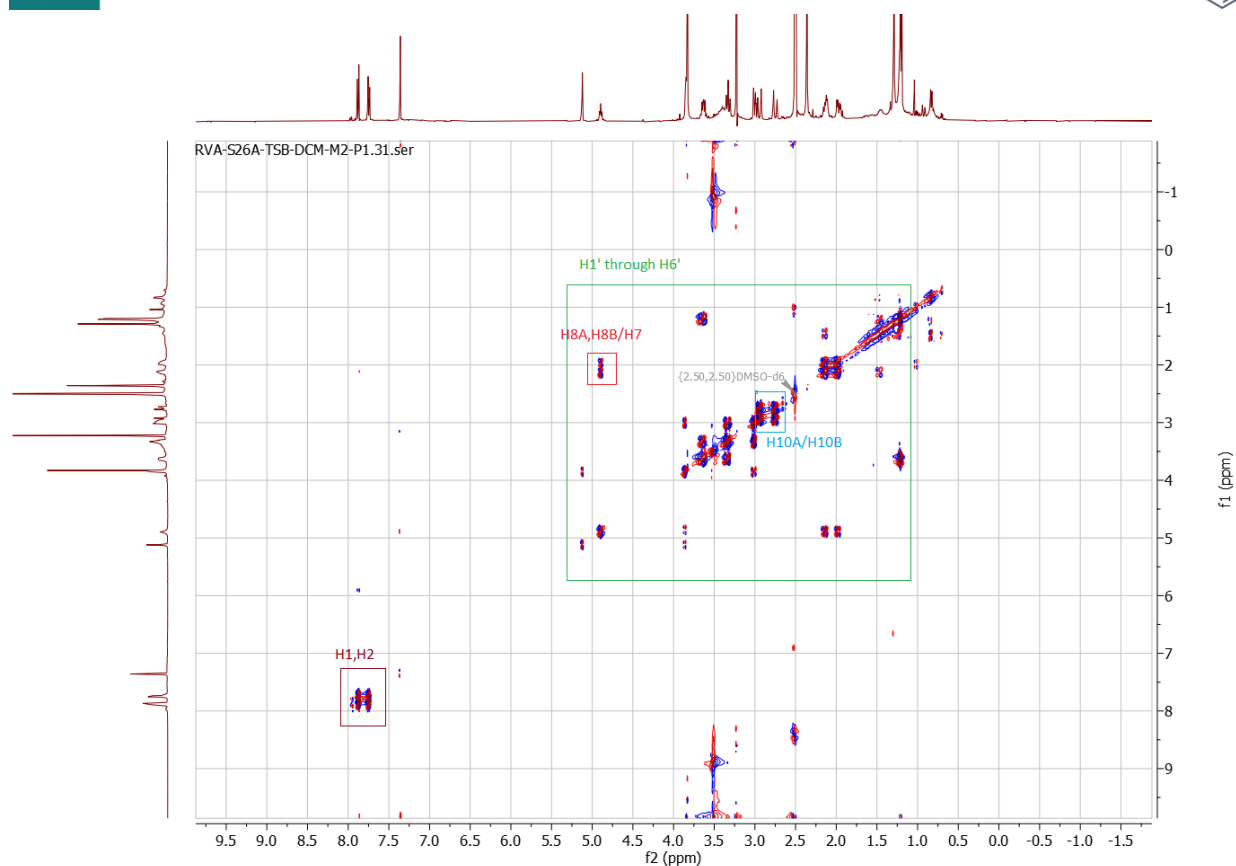

**Figure S7:** DQF COSY of compound **1** in DMSO at 400 MHz with key correlations annotated

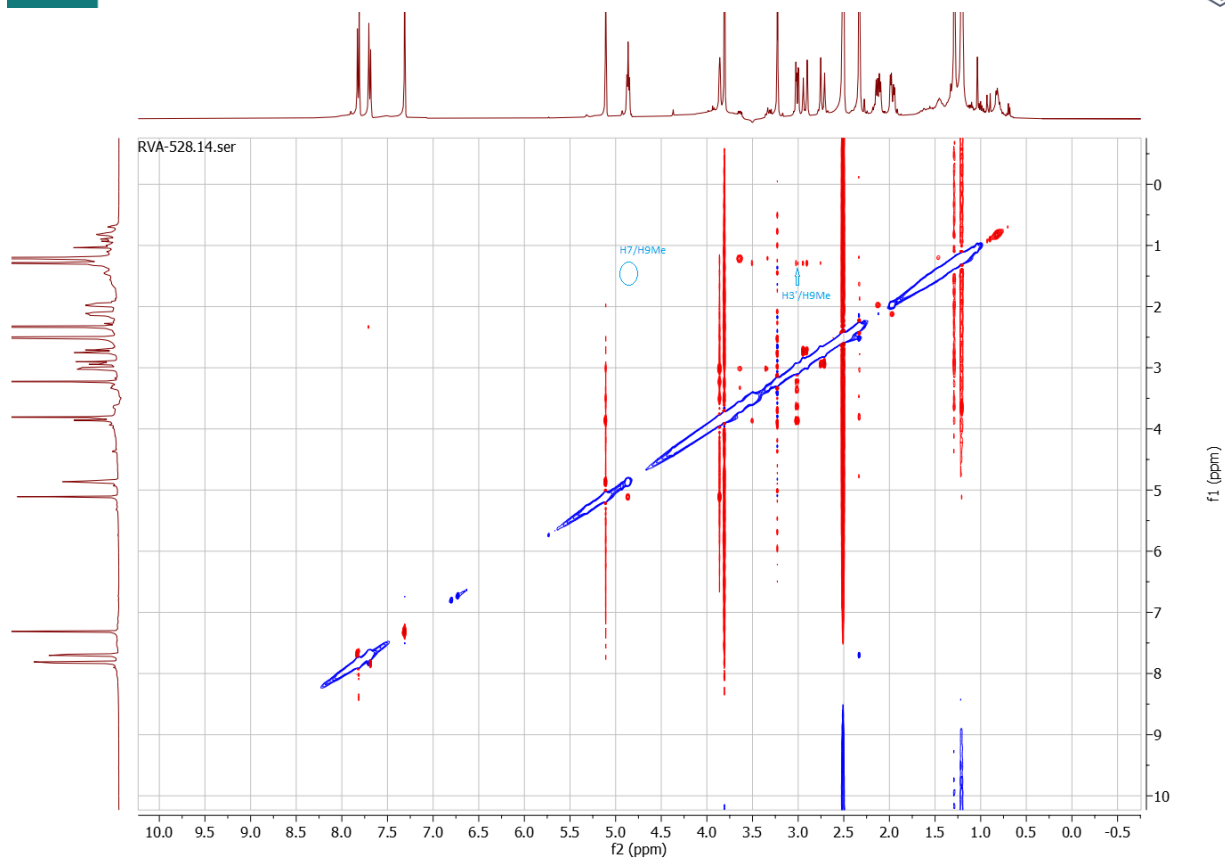

**Figure S8:** ROESY spectrum of compound **1** in DMSO- $d_6$  at 400 MHz with the correlation between H9Me and H3' highlighted and the lack of correlation between H7 and H9Me at the same level also highlighted.

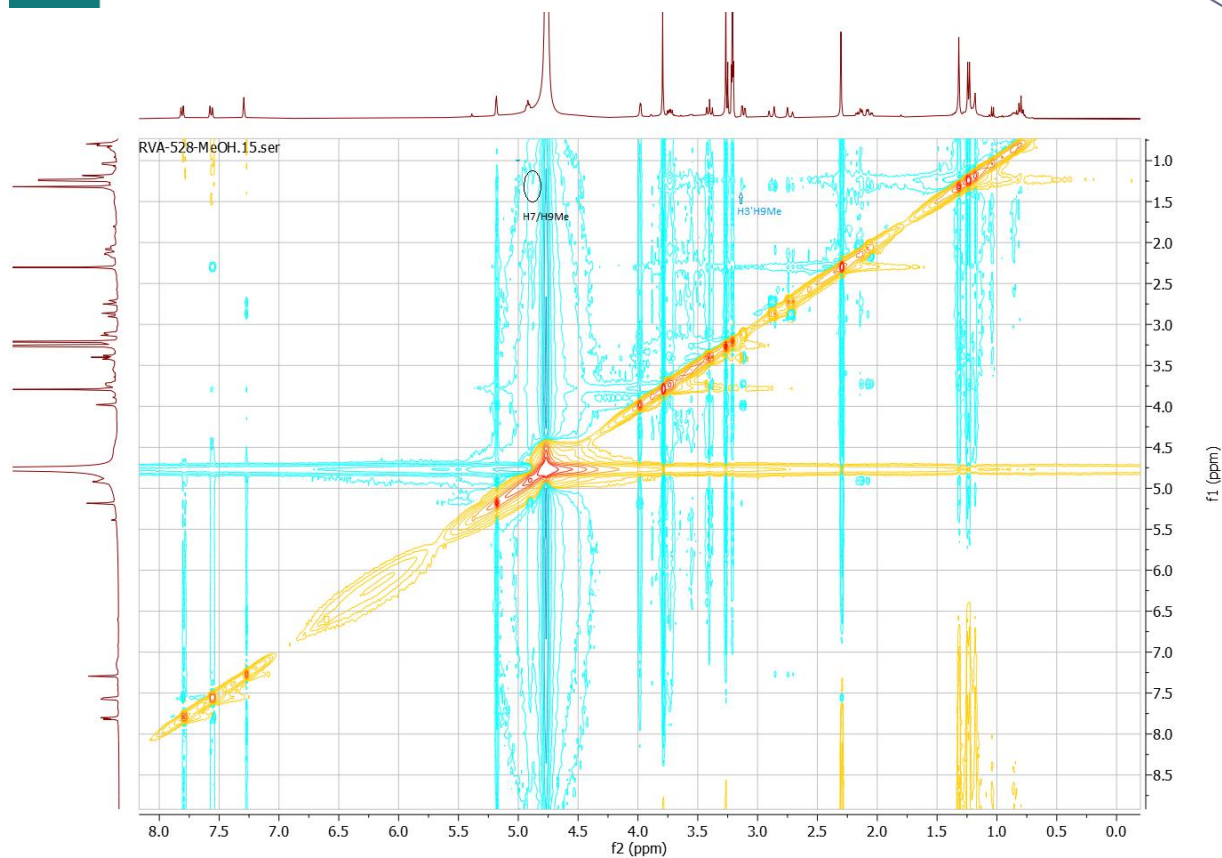

**Figure S9:** ROESY spectrum of compound **1** in CD<sub>3</sub>OD at 400 MHz with the correlation between H9Me and H3' highlighted and the lack of correlation between H7 and H9Me at the same level also highlighted

| Diastereomer<br>7S9R                   | Diastereomer<br>7R9R                   | Diastereomer<br>7R9S                   | Diastereomer<br>7S9S                   |
|----------------------------------------|----------------------------------------|----------------------------------------|----------------------------------------|
| Distances between <b>H9Me</b> and      |                                        |                                        |                                        |
| <b>H7</b> : 3.9, 4.4, 5.2<br>GM = 4.5  | <b>H7</b> : 4.8, 5.5, 4.5<br>GM = 4.9  | <b>H7</b> : 4.5, 5.5, 5.8<br>GM = 5.2  | <b>H7</b> : 4.9, 4.8, 5.6<br>GM = 5.1  |
| <b>H3'</b> : 3.3, 3.2, 4.5<br>GM = 3.6 | <b>H3'</b> : 6.4, 5.3, 5.7<br>GM = 5.8 | <b>H3'</b> : 3.6, 5.3, 4.9<br>GM = 4.5 | <b>H3'</b> : 5.3, 5.9, 6.5<br>GM = 5.9 |

**Table S1:** comparison of distances (in Å) and their geometric means between H7, H3' and H9Me measured for all 4 diastereomers of **1**

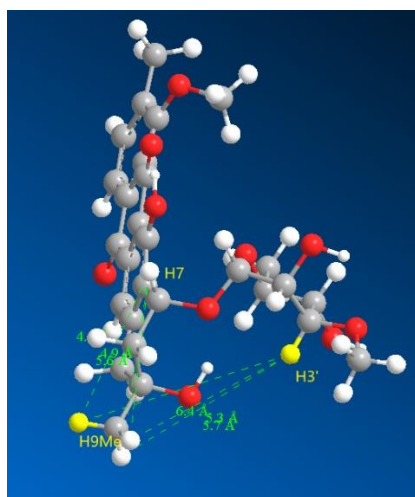

**Figure S10:** the distances between H7, H3' and H9Me shown where the configuration of position 7 is R and that of position of 9 is R

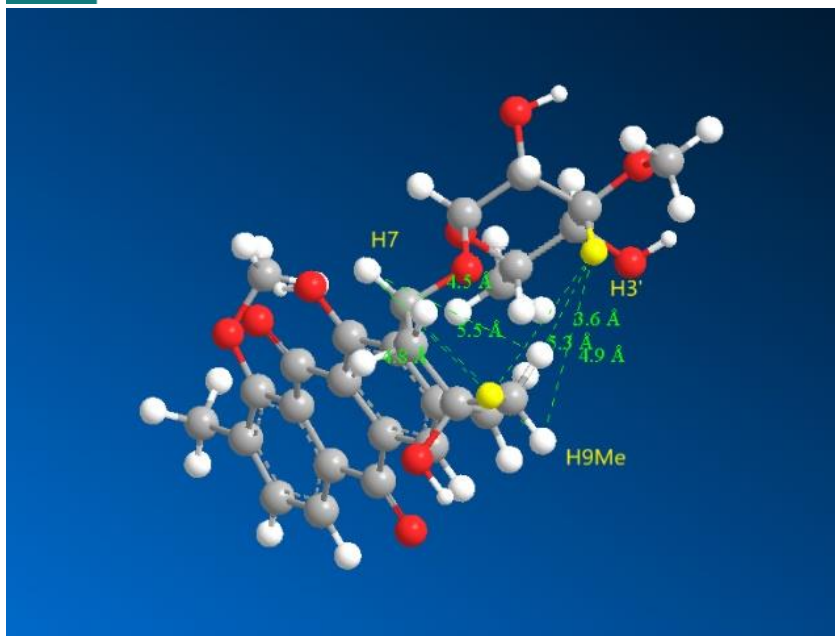

**Figure S11:** the distances between H7, H3' and H9Me shown where the configuration of position 7 is R and that of position of 9 is S

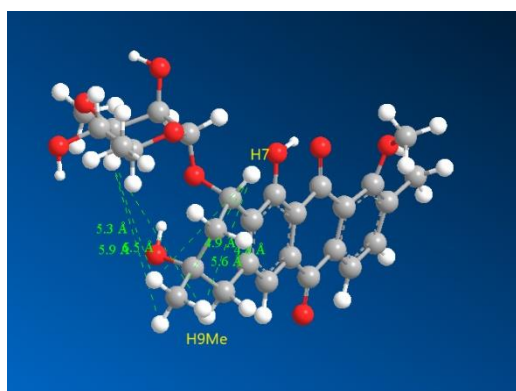

(a)

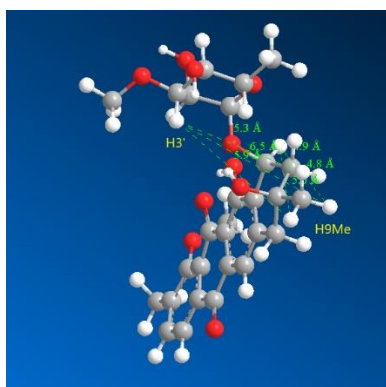

(b)

**Figure S12:** the distances between (a) H7 and H9Me and (b) H3' and H9Me shown where the configuration of position 7 is S and that of position of 9 is S

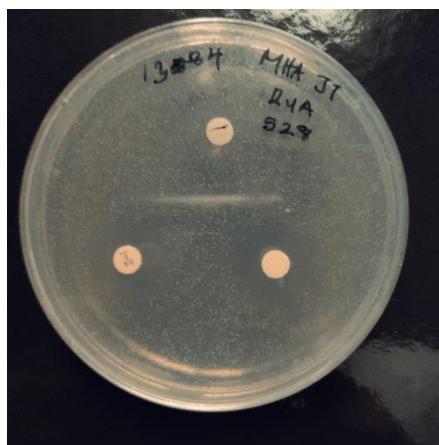

(a)

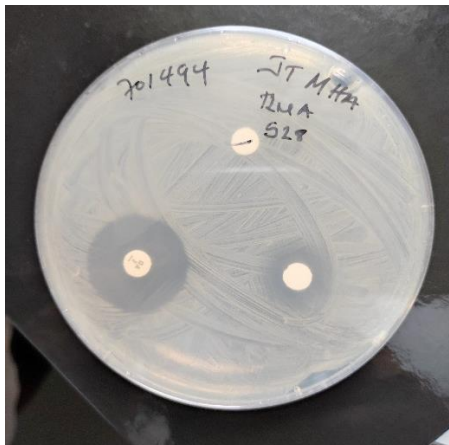

(b)

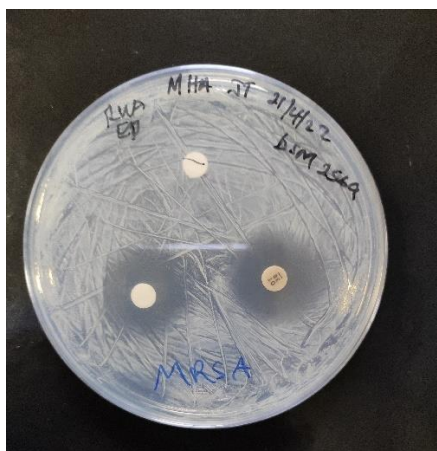

(c)

**Figure S13:** Disc diffusion assay results of compound **1** against (a) *Enterococcus pseudoavium* NCIMB 13084 (b) *Staphylococcus aureus subsp. aureus* NCIMB 701494 (c) Methicillin resistant *Staphylococcus aureus* DSMZ 2569
